# Supplementary material
Source: Springer Nature journal article supplement (https://www.springermedizin.de/resource/supplementary/12884_2013_1136_MOESM3_ESM.pdf/9458996)

Proportion of Women Still Alive

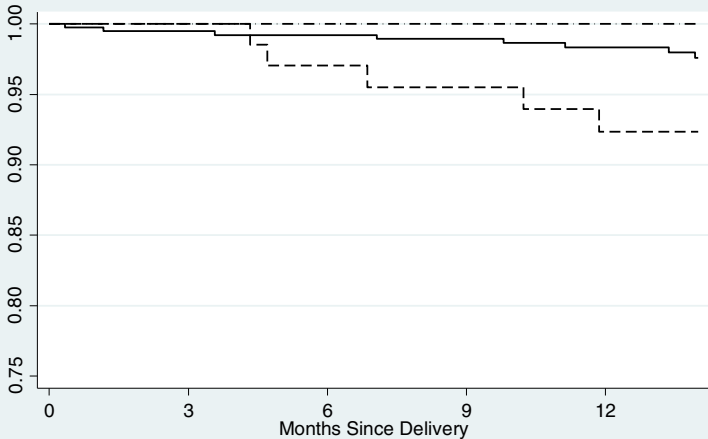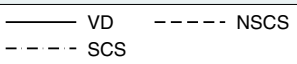

Supplement: MOESM3 [file 9458996]
